# Supplementary material for: Exploratory graph analysis on the Connor–Davidson Resilience Scale (CD-RISC) among older adults in China
Source: PubMed Central journal article supplement (PMC10651855; doi:10.1038/s41598-023-46854-x), 2023-11-15
Supplement: 41598_2023_46854_MOESM1_ESM.pdf [file 41598_2023_46854_MOESM1_ESM.pdf]

## Supplementary 1 Item Summary with Dimensions of the CD-RISC-25

| Item description                                | Dimension with description | Items by dimension |
|-------------------------------------------------|----------------------------|--------------------|
| Able to adapt to change                         | optimism                   | 2,3,4,6            |
| Close and secure relationships                  |                            |                    |
| Sometimes fate or God can help me               |                            |                    |
| Can deal with whatever comes                    |                            |                    |
| Past success gives confidence for new challenge |                            |                    |
| See the humorous side of things                 |                            |                    |
| Coping with stress strengthens                  |                            |                    |
| Tend to bounce back after illness or hardship   |                            |                    |
| Things happen for a reason                      |                            |                    |
| Best effort no matter what                      |                            |                    |
| You can achieve your goals                      |                            |                    |
| Things look hopeless, I don't give up           |                            |                    |
| Know where to turn for help                     |                            |                    |
| Under pressure, focus and think clearly         |                            |                    |
| Prefer to take lead in problem solving          |                            |                    |
| Not easily discouraged by failure               |                            |                    |
| Think of self as strong person                  |                            |                    |
| Make unpopular or difficult decisions           |                            |                    |
| Can handle unpleasant feelings                  | strength                   | 1,5,7,8,9,10,24,25 |
| Have to act on a hunch                          |                            |                    |
| Strong sense of purpose                         |                            |                    |
| In control of your life                         |                            |                    |
| I like challenges                               |                            |                    |
| You work to attain your goals                   |                            |                    |
| Pride in your achievements                      |                            |                    |

**Data Availability Statement:**

The datasets generated and/or analyzed during the current study are not publicly available due to necessity of interviewers' privacy but are available from the corresponding author on reasonable request.
